# Supplementary material
Source: MDPI journal article supplement (https://www.mdpi.com/2673-9976/12/1/17)
Supplement: s1 [file s1]

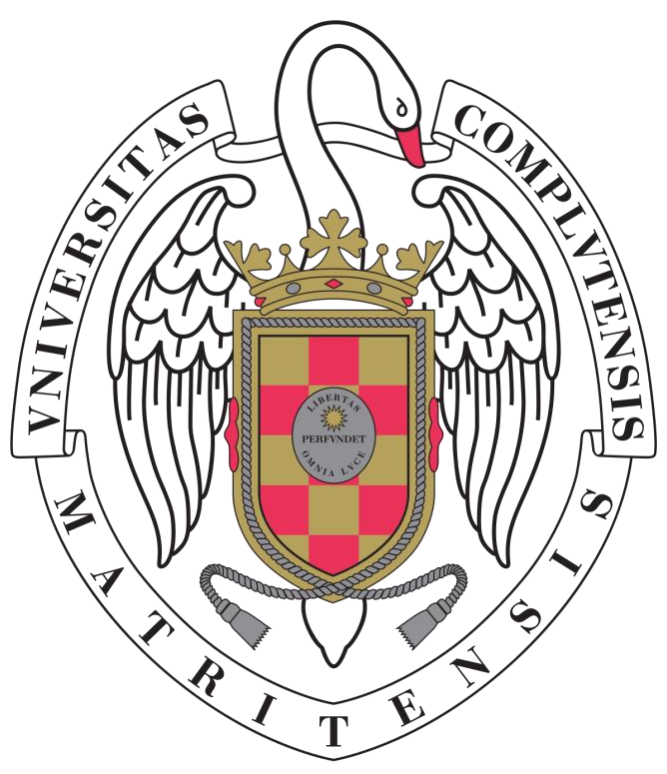

# Effect of silicon-enriched meat consumption on proximal colonic antioxidant status of late-stage T2DM rats

Marina Hernández-Martín<sup>1,2</sup>, Rocío Redondo-Castillejo<sup>1,2</sup>, Aránzazu Bocanegra<sup>1</sup>, Alba Garcimartín<sup>1</sup>, Adrián Macho-González<sup>3</sup>, Juana Benedí<sup>1</sup>, M. José González-Muñoz<sup>4</sup>, Sara Bastida<sup>3</sup>, Francisco J. Sánchez-Muniz<sup>3</sup> and M. Elvira López-Oliva<sup>2</sup>

<sup>1</sup> Department of Pharmacology, Pharmacognosy and Botany. Faculty of Pharmacy. Complutense University of Madrid

<sup>2</sup> Departmental Section of Physiology. Faculty of Pharmacy. Complutense University of Madrid

<sup>3</sup> Department of Nutrition and Food Science. Faculty of Pharmacy. Complutense University of Madrid.

<sup>4</sup> Department of Biomedical Sciences; Toxicology Teaching Unit. Faculty of Pharmacy. University of Alcalá

## INTRODUCTION:

Colonic mucosa exhibits numerous functional alterations associated to Type 2 Diabetes Mellitus (T2DM). Oxidative stress, a factor involved in T2DM pathogenesis and its complications, may contribute to some of those colonic alterations. Silicon (Si) is a trace element with antioxidant, anti-inflammatory and anti-diabetic effects.

## OBJECTIVES:

In this study, we examined if Si intake as a functional ingredient might enhance the antioxidant status of proximal colonic mucosal barrier in late-stage T2DM rats.

## METHODS:

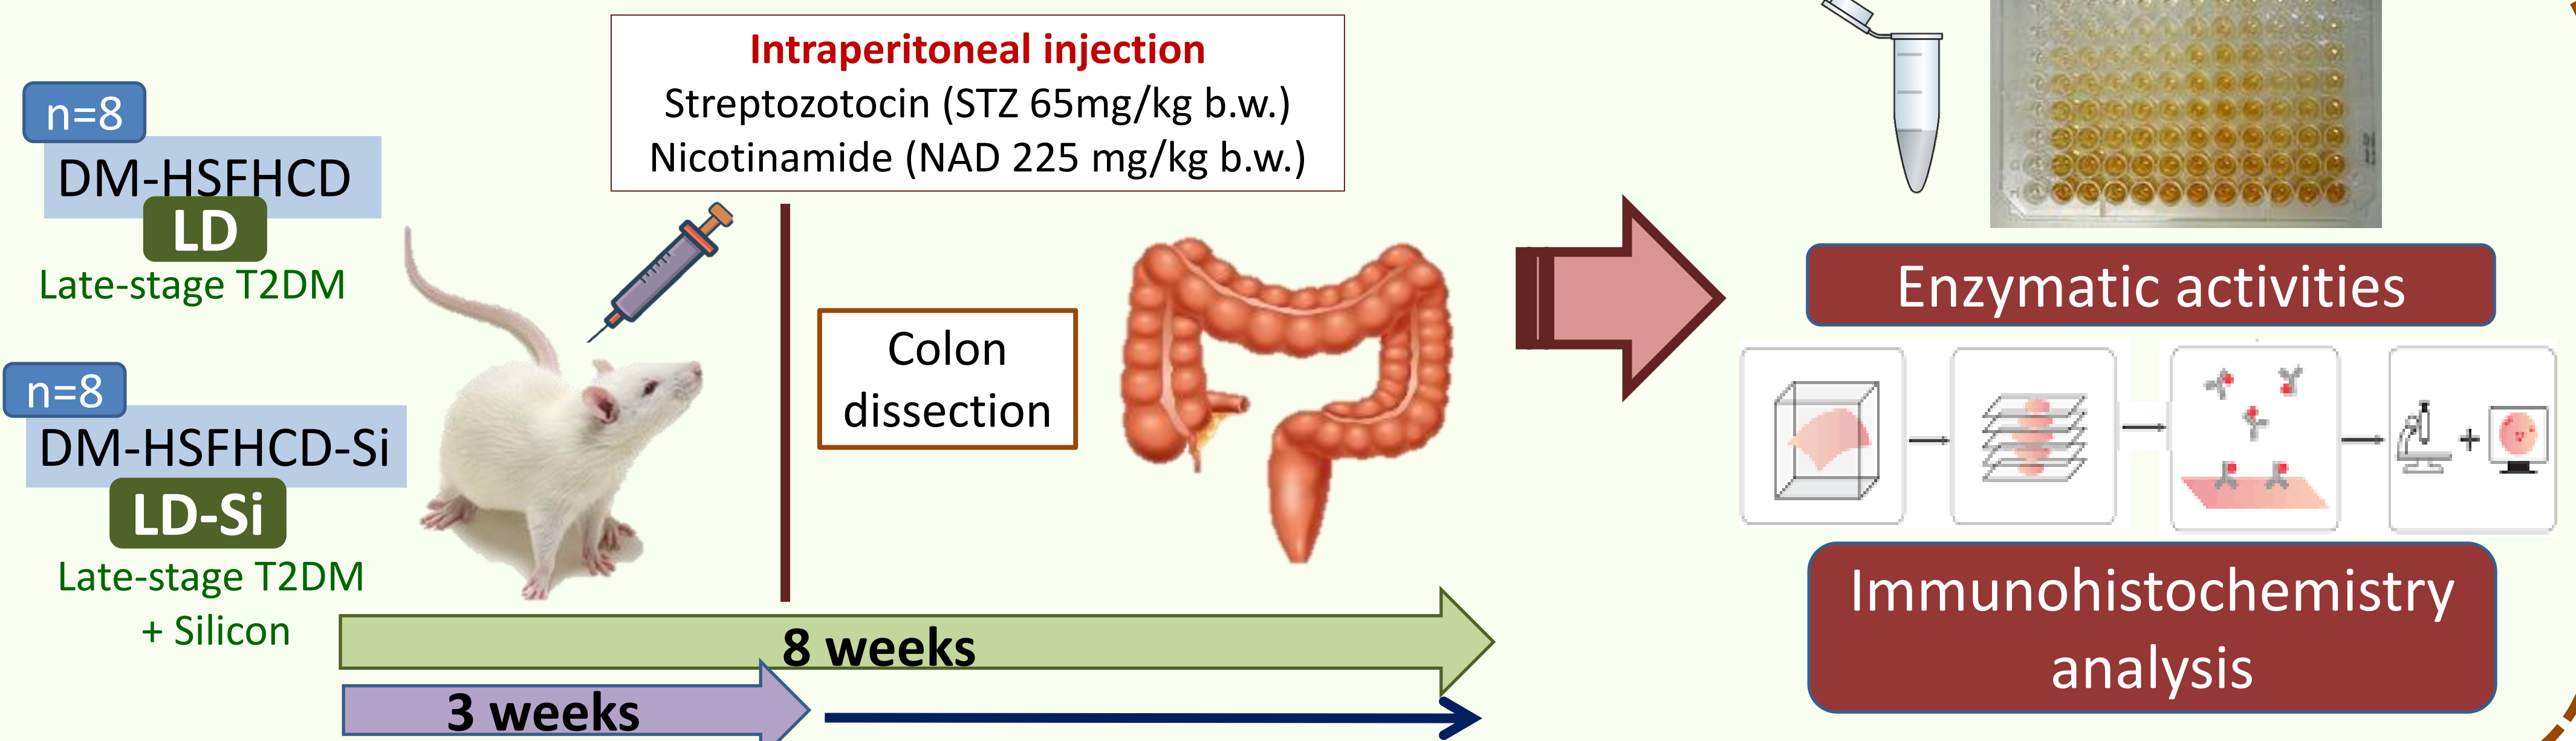

## RESULTS

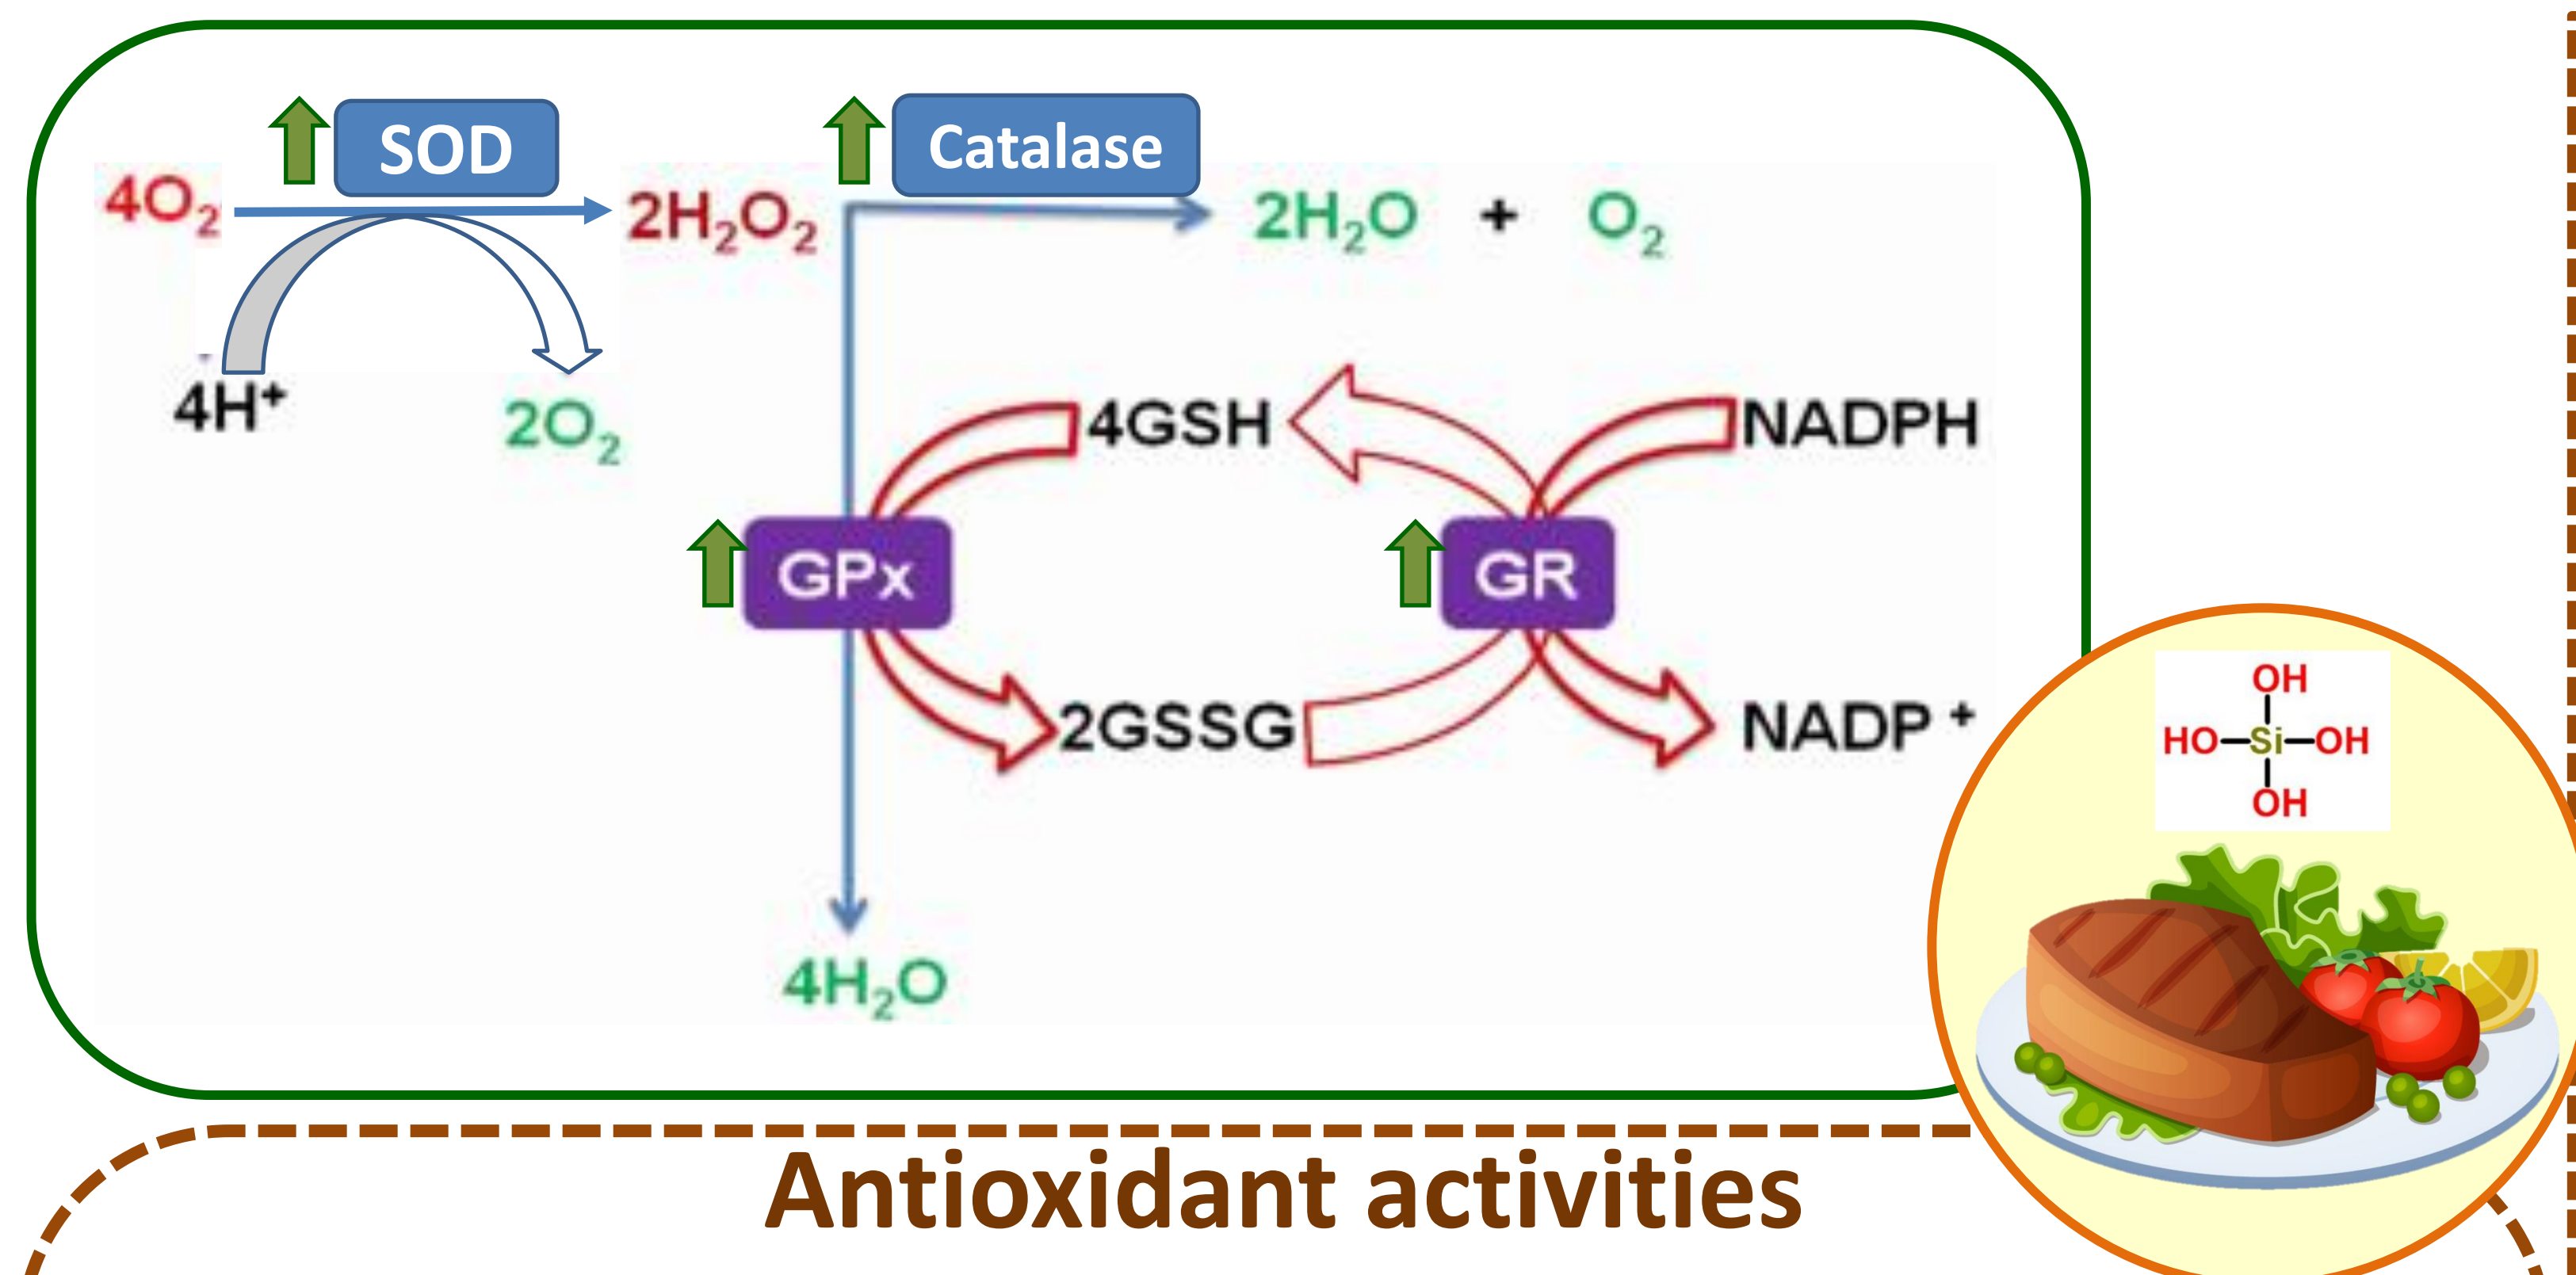

## Antioxidant Immunohistochemistry

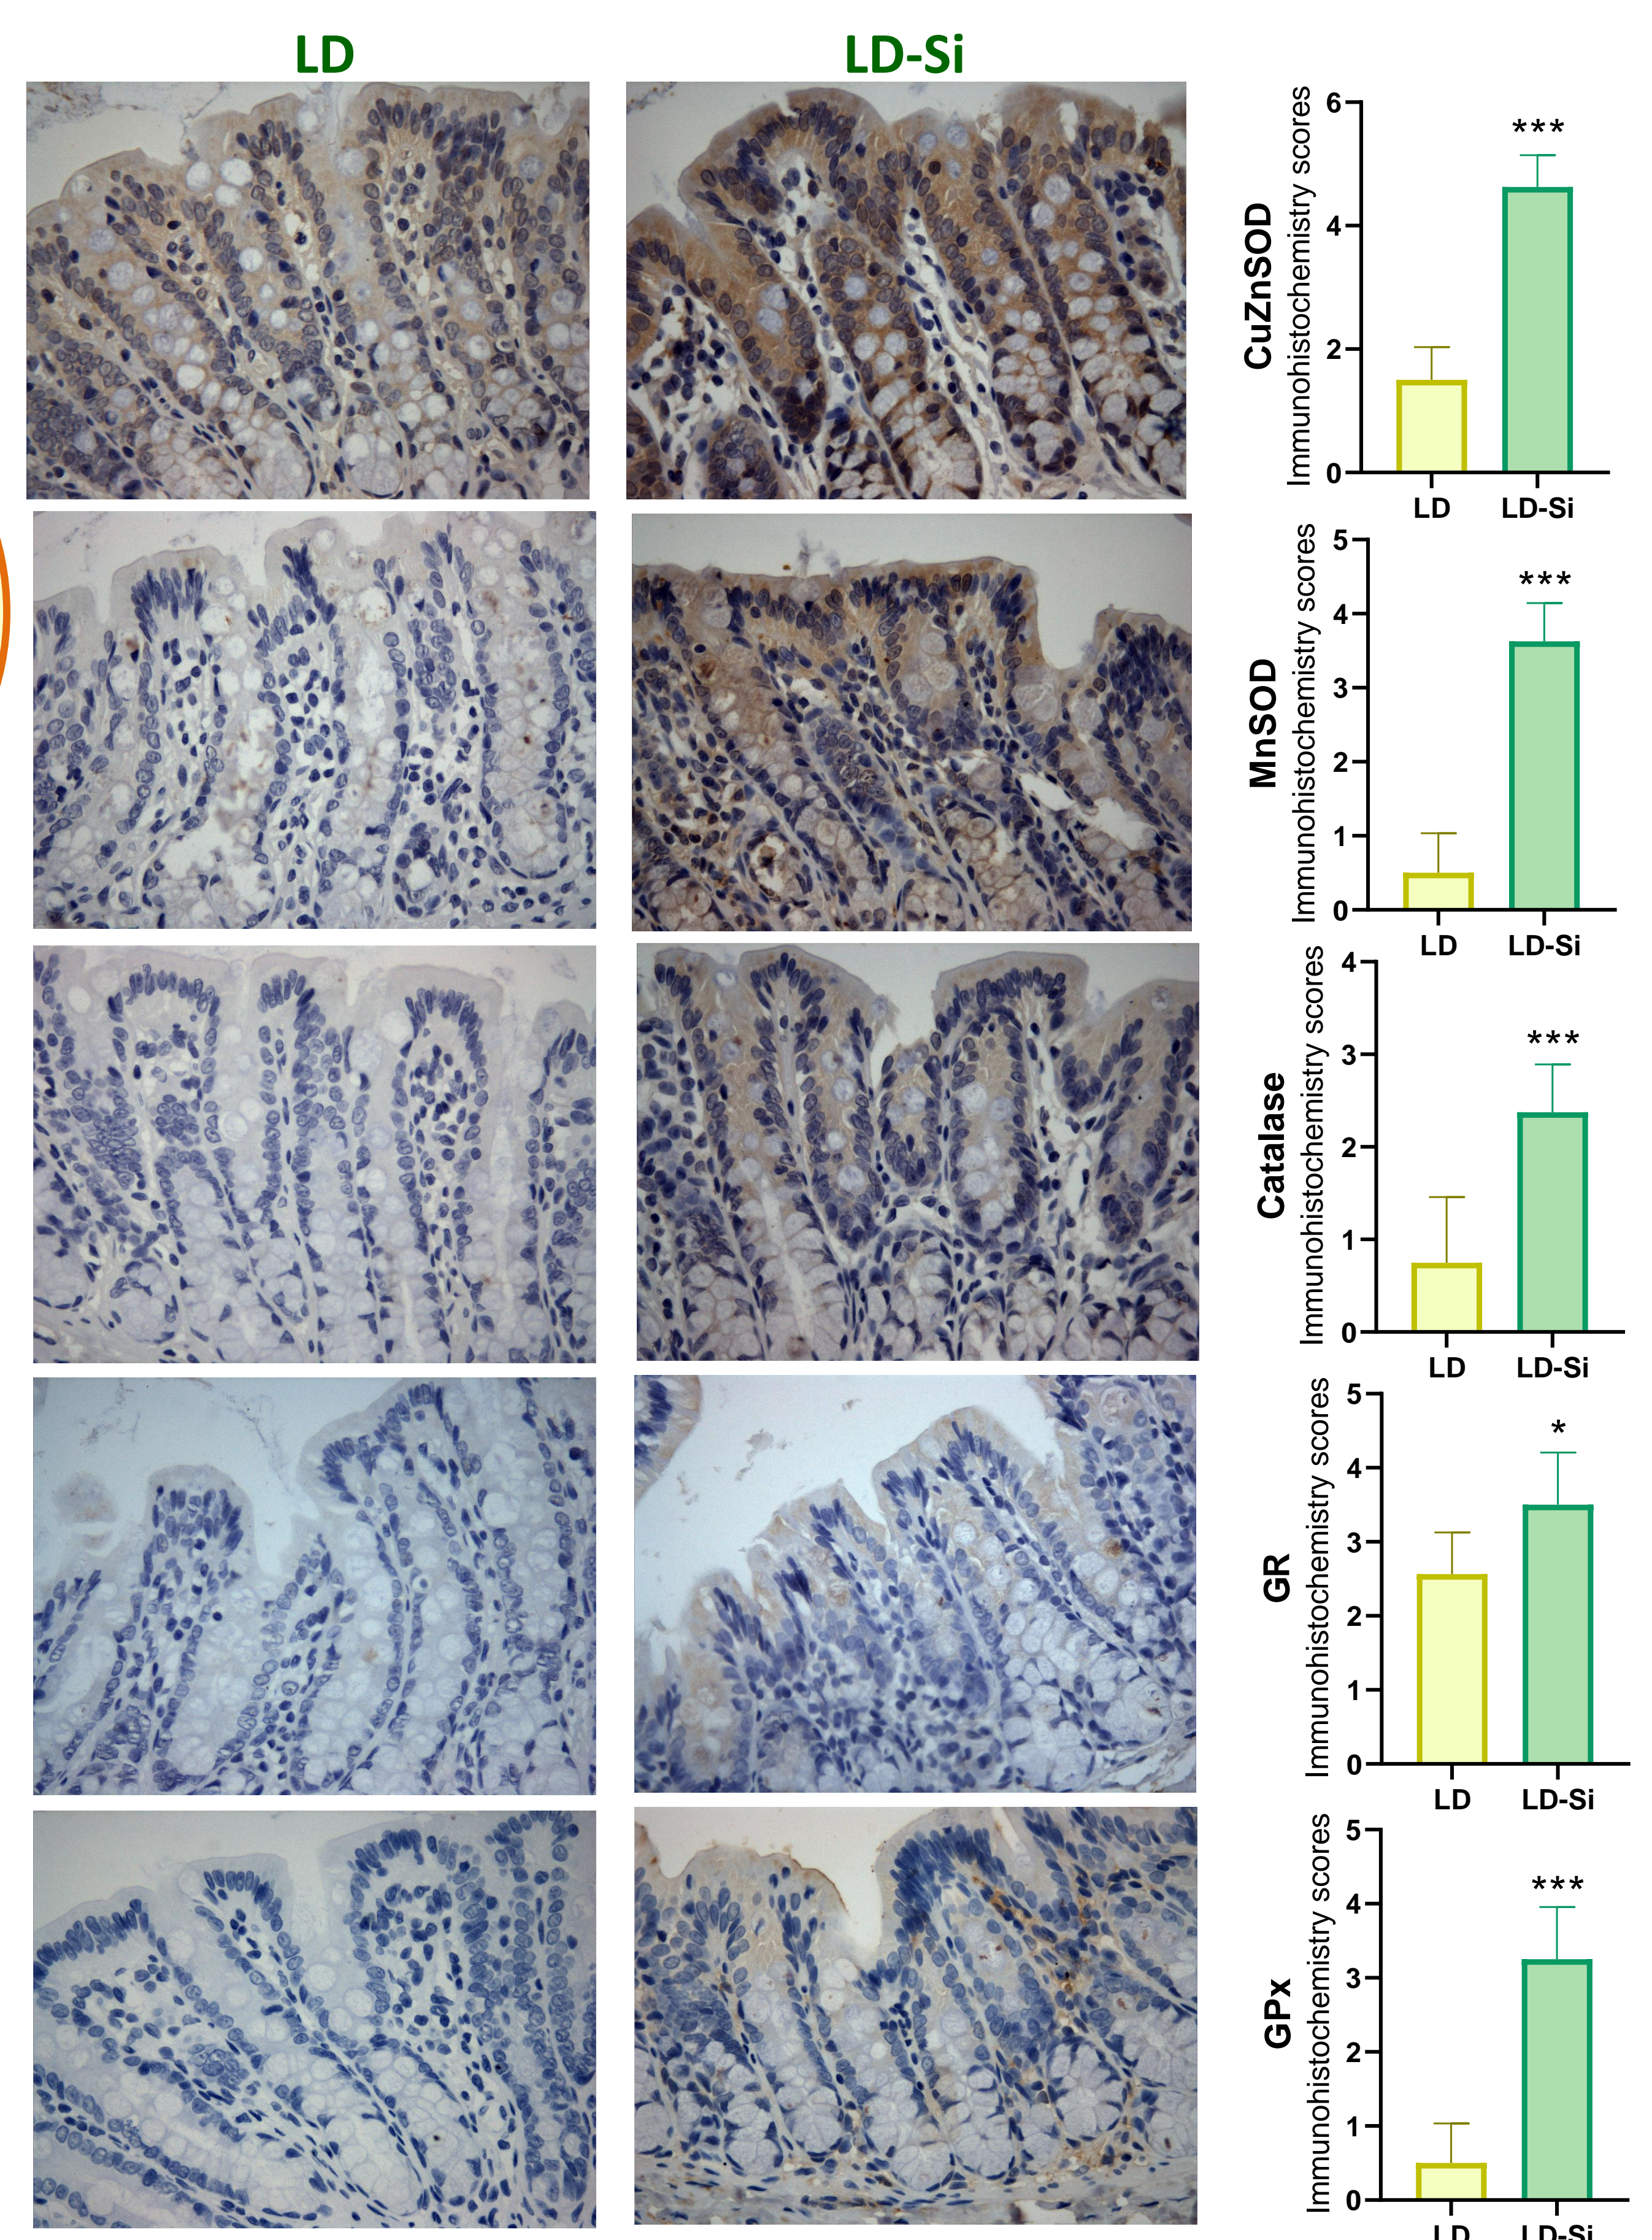

## Antioxidant activities

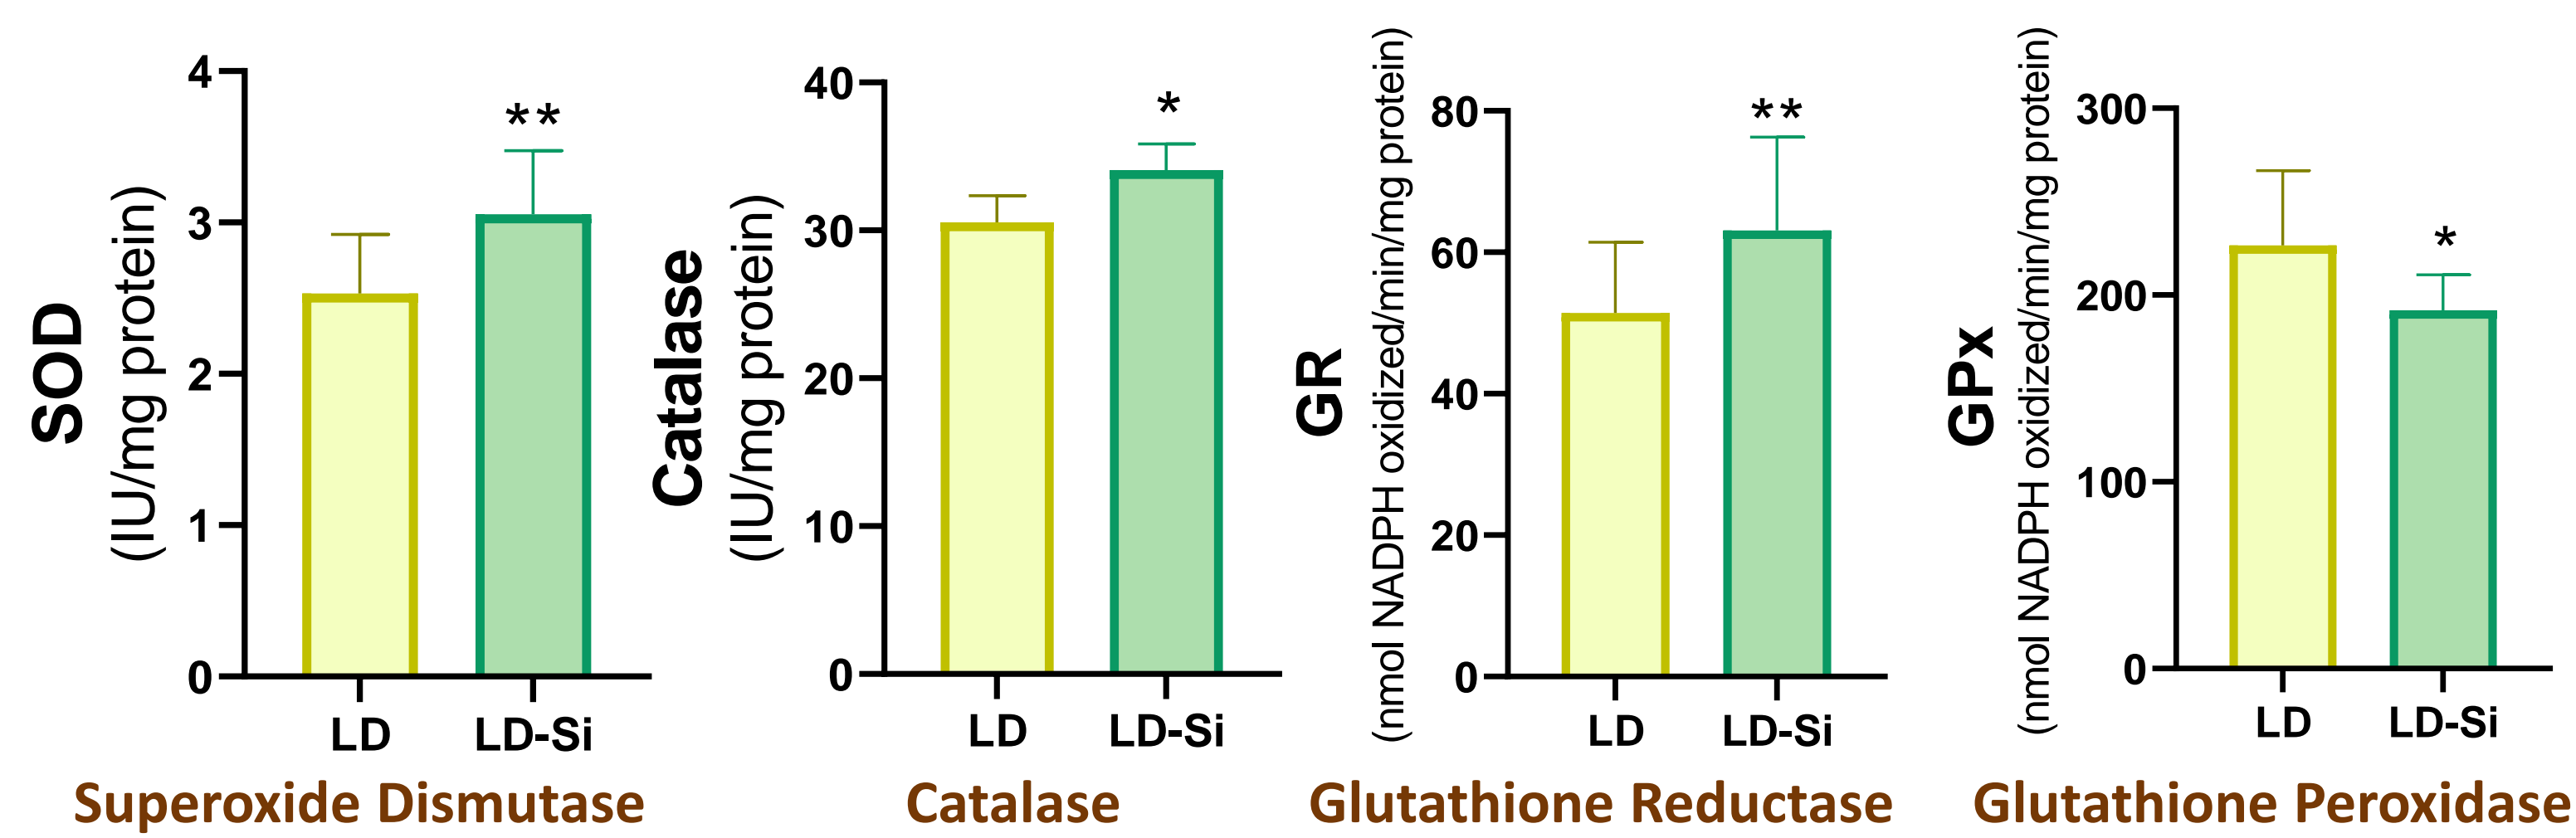

Values are means  $\pm$  Standard Error of the Mean (SEM). Asterisks indicate significant differences between groups, being  $p=0.01$ , \*,  $p=0.001$ , \*\* and  $p\leq 0.0001$ , \*\*\*. ANOVA ( $p<0.05$ ).

- ✓ LD-Si group showed significant higher levels in immunohistochemistry scores of all antioxidant enzymes studied respect to LD group.
- ✓ Silicon intake also induced higher total SOD, Catalase and GR enzymatic activities.

## CONCLUSIONS:

Silicon effectively protected colonic mucosa against oxidative stress induced by T2DM. The incorporation of Si as a functional ingredient could be suitable as a new nutritional tool to reverse colonic mucosa dysfunction associated to metabolic disorders, such as T2DM.

**ACKNOWLEDGMENTS:** This study was supported by Spanish project PID2019-103872RB-I00

**IECN**  
**2022**

**The 2nd International Electronic Conference on Nutrients**  
Nutrition Support for Immunity and Countermeasure Effects on  
Infection, Inflammation, and Oxidative Stress  
15-31 MARCH 2022 | ONLINE
